# Supplementary material
Source: ML conference proceedings conference paper supplement (https://proceedings.mlr.press/v37/neyshabur15.html)
Supplement: Supplementary file 1 [file neyshabur15-supp.pdf]

---

## Supplementary Material: On Symmetric and Asymmetric LSHs for Inner Product Search

---

**Behnam Neyshabur**  
**Nathan Srebro**

Toyota Technological Institute at Chicago, Chicago, IL 60637, USA

BNEYSHABUR@TTIC.EDU  
NATI@TTIC.EDU

### 1. Another variant

To benefit from the empirical advantages of random projection hashing, [Shrivastava and Li \(2014\)](#) also proposed a modified asymmetric LSH, which we refer to here as SIGN-ALSH(SL). SIGN-ALSH(SL) uses two different mappings  $P(x)$ ,  $Q(q)$ , similar to those of L2-ALSH(SL), but then uses a random projection hash  $h_a(x)$ , as is the one used by SIMPLE-LSH, instead of the quantized hash used in L2-ALSH(SL). In this appendix we show that our theoretical observations about L2-ALSH(SL) are also valid for SIGN-ALSH(SL).

SIGN-ALSH(SL) uses the pair of mappings:

$$\begin{aligned} P(x) &= [Ux; 1/2 - \|Ux\|^2; \dots; 1/2 - \|Ux\|^{2^m}] \\ Q(y) &= [y; 0; 0; \dots; 0], \end{aligned} \quad (1)$$

where  $m$  and  $U$  are parameters, as in L2-ALSH(SL). SIGN-ALSH(LS) is then given by  $f(x) = h_a(P(x))$ ,  $g(y) = h_a(Q(x))$ , where  $h_a$  is the random projection hash given in (11). SIGN-ALSH(LS) therefor depends on two parameters, and uses a binary alphabet  $\Gamma = \{\pm 1\}$ .

In this section, we show that, like L2-ALSH(LS), SIGN-ALSH(LS) is not a universal ALSH over  $\mathcal{X}_\bullet$ ,  $\mathcal{Y}_\circ$ , and moreover for any  $S > 0$  and  $0 < c < 1$  it is not an  $(S, cS)$ -ALSH over  $\mathcal{X}_\bullet = \mathcal{Y}_\circ$ :

**Lemma 1.** *For any  $m, U, r$ , and for any  $0 < S < 1$  and*

$$\min \left\{ \sqrt{1 - \frac{U^{2^{m+1}}(1 - S^{2^{m+1}})}{U^{2^{m+1}} + m/4}}, \frac{2^{m+1} \sqrt{\frac{(m/2)}{2^{m+1}-2}}}{SU} \right\} \leq c < 1$$

*SIGN-ALSH(SL) is not an  $(S, cS)$ -ALSH for inner product similarity over  $\mathcal{X}_\bullet = \{x | \|x\| \leq 1\}$  and  $\mathcal{Y}_\circ = \{q | \|q\| = 1\}$ .*

*Proof.* Assume for contradiction that:

$$\sqrt{1 - \frac{U^{2^{m+1}}(1 - S^{2^{m+1}})}{U^{2^{m+1}} + m/4}} \leq c < 1$$

and SIGN-ALSH(SL) is an  $(S, cS)$ -ALSH. For any query point  $q \in \mathcal{Y}_\circ$ , let  $x \in \mathcal{X}_\bullet$  be a vector s.t.  $q^\top x = S$  and

$\|x\|_2 = 1$  and let  $y = cSq$ , so that  $q^\top y = cS$ . We have that:

$$\begin{aligned} \frac{(P(y)^\top Q(q))^2}{\|P(y)\|^2} &= \frac{c^2 S^2 U^2}{m/4 + \|y\|^{2^{m+1}}} \\ &= \frac{c^2 S^2 U^2}{m/4 + (cSU)^{2^{m+1}}} \end{aligned}$$

Using  $1 - \frac{U^{2^{m+1}}(1 - S^{2^{m+1}})}{U^{2^{m+1}} + m/4} \leq c^2 < 1$ :

$$\begin{aligned} &> \frac{c^2 S^2 U^2}{m/4 + (SU)^{2^{m+1}}} \\ &\geq \frac{S^2 U^2}{m/4 + U^{2^{m+1}}} \\ &= \frac{(P(x)^\top Q(q))^2}{\|P(x)\|^2} \end{aligned}$$

The monotonicity of  $1 - \frac{\cos^{-1}(x)}{\pi}$  establishes a contradiction. To get the other bound on  $c$ , let  $\alpha_m = 2^{m+1} \sqrt{\frac{(m/2)}{2^{m+1}-2}}$  and assume for contradiction that:

$$\frac{\alpha_m}{SU} = \frac{2^{m+1} \sqrt{\frac{(m/2)}{2^{m+1}-2}}}{SU} \leq c < 1$$

and SIGN-ALSH(SL) is an  $(S, cS)$ -ALSH. For any query point  $q \in \mathcal{Y}_\circ$ , let  $x \in \mathcal{X}_\bullet$  be a vector s.t.  $q^\top x = S$  and  $\|x\|_2 = 1$  and let  $y = (\alpha_m/U)q$ . By the monotonicity of  $1 - \frac{\cos^{-1}(x)}{\pi}$ , to get a contradiction is enough to show that

$$\frac{P(x)^\top Q(q)}{\|P(x)\|} \leq \frac{P(y)^\top Q(q)}{\|P(y)\|}$$

We have:

$$\begin{aligned} \frac{(P(y)^\top Q(q))^2}{\|P(y)\|^2} &= \frac{\alpha_m^2}{m/4 + \|\alpha_m\|^{2^{m+1}}} \\ &= \frac{2^m \sqrt{\frac{(m/2)}{2^{m+1}-2}}}{m/4 + \frac{(m/2)}{2^{m+1}-2}} \end{aligned}$$

Since this is the maximum value of the function  $f(U) = U^2/(m/4 + U^{2m+1})$ :

$$\begin{aligned} &\geq \frac{U^2}{m/4 + U^{2m+1}} \\ &\geq \frac{S^2 U^2}{m/4 + U^{2m+1}} \\ &= \frac{(P(x)^\top Q(q))^2}{\|P(x)\|^2} \end{aligned}$$

which is a contradiction.  $\square$

**Corollary 1.1.** *For any  $U, m$  and  $r$ , SIGN-ALSH(SL) is not a universal ALSH for inner product similarity over  $\mathcal{X}_\bullet = \{x \mid \|x\| \leq 1\}$  and  $\mathcal{Y}_\circ = \{q \mid \|q\| = 1\}$ . Furthermore, for any  $c < 1$ , and any choice of  $U, m, r$  there exists  $0 < S < 1$  for which SIGN-ALSH(SL) is not an  $(S, cS)$ -ALSH over  $\mathcal{X}_\bullet, \mathcal{Y}_\circ$ , and for any  $S < 1$  and any choice of  $U, m, r$  there exists  $0 < c < 1$  for which SIGN-ALSH(SL) is not an  $(S, cS)$ -ALSH over  $\mathcal{X}_\bullet, \mathcal{Y}_\circ$ .*

**Lemma 2.** *For any  $S > 0$  and  $0 < c < 1$  there are no  $U$  and  $m$  such that SIGN-ALSH(SL) is an  $(S, cS)$ -ALSH for inner product similarity over  $\mathcal{X}_\bullet = \mathcal{Y}_\bullet = \{x \mid \|x\| \leq 1\}$ .*

*Proof.* Similar to the proof of Theorem 5.2, for any  $S > 0$  and  $0 < c < 1$ , let  $q_1$  and  $x_1$  be unit vectors such that  $q_1^\top x_1 = S$ . Let  $x_2$  be a unit vector and define  $q_2 = cSx_2$ . For any  $U$  and  $m$ :

$$\begin{aligned} \frac{P(x_2)^\top Q(q_2)}{\|P(x_2)\| \|Q(q_2)\|} &= \frac{cSU}{cS\sqrt{m/4 + \|U\|^{2m+1}}} \\ &= \frac{U}{\sqrt{m/4 + \|U\|^{2m+1}}} \\ &\geq \frac{SU}{\sqrt{m/4 + \|U\|^{2m+1}}} \\ &= \frac{P(x_1)^\top Q(q_1)}{\|P(x_1)\| \|Q(q_1)\|} \end{aligned}$$

Now, the same arguments as in Lemma 1 using monotonicity of collision probabilities in  $\|P(x) - Q(q)\|$  establish SIGN-ALSH(SL) is not an  $(S, cS)$ -ALSH.  $\square$

## 2. Max-norm and margin complexity

### MAX-NORM

The max-norm (aka  $\gamma_2: \ell_1 \rightarrow \ell_\infty$  norm) is defined as (Srebro et al., 2005):

$$\|X\|_{\max} = \min_{X=UV^\top} \max(\|U\|_{2,\infty}^2, \|V\|_{2,\infty}^2) \quad (2)$$

where  $\|U\|_{2,\infty}$  is the maximum over  $\ell_2$  norms of rows of matrix  $U$ , i.e.  $\|U\|_{2,\infty} = \max_i \|U[i]\|$ .

For any pair of sets  $(\{x_i\}_{1 \leq i \leq n}, \{y_i\}_{1 \leq i \leq m})$  and hashes  $(f, g)$  over them, let  $P$  be the collision probability matrix, i.e.  $P(i, j) = \mathbb{P}[f(x_i) = g(y_j)]$ . In the following lemma we prove that  $\|P\|_{\max} \leq 1$ :

**Lemma 3.** *For any two sets of objects and hashes over them, if  $P$  is the collision probability matrix, then  $\|P\|_{\max} \leq 1$ .*

*Proof.* For each  $f$  and  $g$ , define the following biclustering matrix:

$$\kappa_{f,g}(i, j) = \begin{cases} 1 & f(x_i) = g(y_j) \\ 0 & \text{otherwise.} \end{cases} \quad (3)$$

For any function  $f: \mathcal{Z} \rightarrow \Gamma$ , let  $R_f \in \{0, 1\}^{n \times |\Gamma|}$  be the indicator of the values of function  $f$ :

$$R_h(i, \gamma) = \begin{cases} 1 & h(x_i) = \gamma \\ 0 & \text{otherwise,} \end{cases} \quad (4)$$

and define  $R_g \in \{0, 1\}^{m \times |\Gamma|}$  similarly. It is easy to show that  $\kappa_{f,g} = R_f R_g^\top$  and since  $\|R_f\|_{2,\infty} = \|R_g\|_{2,\infty} = 1$ , by the definition of the max-norm, we can conclude that  $\|\kappa_{f,g}\|_{\max} \leq 1$ . But the collision probabilities are given by  $P = \mathbb{E}[\kappa_{f,g}]$ , and so by convexity of the max-norm and Jensen's inequality,  $\|P\|_{\max} = \|\mathbb{E}[\kappa_{f,g}]\|_{\max} \leq \mathbb{E}[\|\kappa_{f,g}\|_{\max}] \leq 1$ .  $\square$

It is also easy to see that  $1_{n \times n} = RR^\top$  where  $R = 1_{n \times 1}$ . Therefore for any  $\theta \in \mathbb{R}$ ,

$$\|\theta_{n \times n}\|_{\max} = \theta \|1_{n \times n}\|_{\max} \leq |\theta|$$

### MARGIN COMPLEXITY

For any sign matrix  $Z$ , the margin complexity of  $Z$  is defined as:

$$\begin{aligned} \min_Y \|Y\|_{\max} \\ \text{s.t. } Y(i, j)X(i, j) \geq 1 \quad \forall i, j \end{aligned} \quad (5)$$

Let  $Z \in \{\pm 1\}^{N \times N}$  be a sign matrix with +1 on and above the diagonal and -1 below it. Forster et al. (2003) prove that the margin complexity of matrix  $Z$  is  $\Omega(\log N)$ .

## References

- Forster, J., Schmitt, N., Simon, H., and Suttrop, T. (2003). Estimating the optimal margins of embeddings in euclidean half spaces. *Machine Learning*, 51:263281.
- Shrivastava, A. and Li, P. (2014). Improved asymmetric locality sensitive hashing (alsh) for maximum inner product search (mips). *arXiv:1410.5410*.
- Srebro, N., Rennie, J., and Jaakkola, T. (2005). Maximum margin matrix factorization. *NIPS*.
